# Supplementary material
Source: publisher figshare collection journal article supplement (https://gsapubs.figshare.com/articles/dataset/_/12542609)
Supplement: Supplementary file 1 [file 1]

Flynn, A.G., Davis, A.J., Williamson, T.E., Heizler, M., Fenley, C.W., IV, Leslie, C.E., Secord, R., Brusatte, S.L., and Peppe, D.J., 2020, Early Paleocene Magnetostratigraphy and Revised Biostratigraphy of the Ojo Alamo Sandstone and Lower Nacimiento Formation, San Juan Basin, New Mexico, USA: GSA Bulletin, <https://doi.org/10.1130/B35481.1>.

## Data Repository

TABLE DR1. PALEOMAGNETIC DATA: SAMPLING INFORMATION

TABLE DR2. PALEOMAGNETIC DATA: SITE LINES

TABLE DR3. PALEOMAGNETIC DATA: SITE MEANS

TABLE DR4. PALEOMAGNETIC DATA: GREAT CIRCLES

TABLE DR5. PALEOMAGNETIC REVERSAL TESTS RESULTS

TABLE DR6. MAMMAL LOCALITY DATA

TABLE DR7. SINGLE CRYSTAL LASER FUSION  $^{40}\text{Ar}/^{39}\text{Ar}$  DATA

TABLE DR8. SUMMARY OF  $^{40}\text{Ar}/^{39}\text{Ar}$  STEP HEATING RESULTS

TABLE DR9. SINGLE GRAIN STEP-HEATING  $^{40}\text{Ar}/^{39}\text{Ar}$  DATA

TABLE DR10. IRRADIATION AND CORRECTION FACTOR INFORMATION

TABLE DR11.  $^{40}\text{Ar}/^{39}\text{Ar}$  FULL RAW DATA

Figure DR1. Depositional age model for the Ojo Alamo Sandstone and lower Nacimiento Formation across all sections with both formations arranged from northwest to southeast. All section and lithologic information from Figs. 2-4. Chron boundary ages and chron durations from Ogg (2012).

## REFERENCE CITED

Steiger, R.H., and Jäger, E., 1977, Subcommittee on geochronology: Convention on the use of decay constants in geo- and cosmochemistry: Earth and Planetary Science Letters, v. 36, p. 359–362, [https://doi.org/10.1016/0012-821X\(77\)90060-7](https://doi.org/10.1016/0012-821X(77)90060-7).

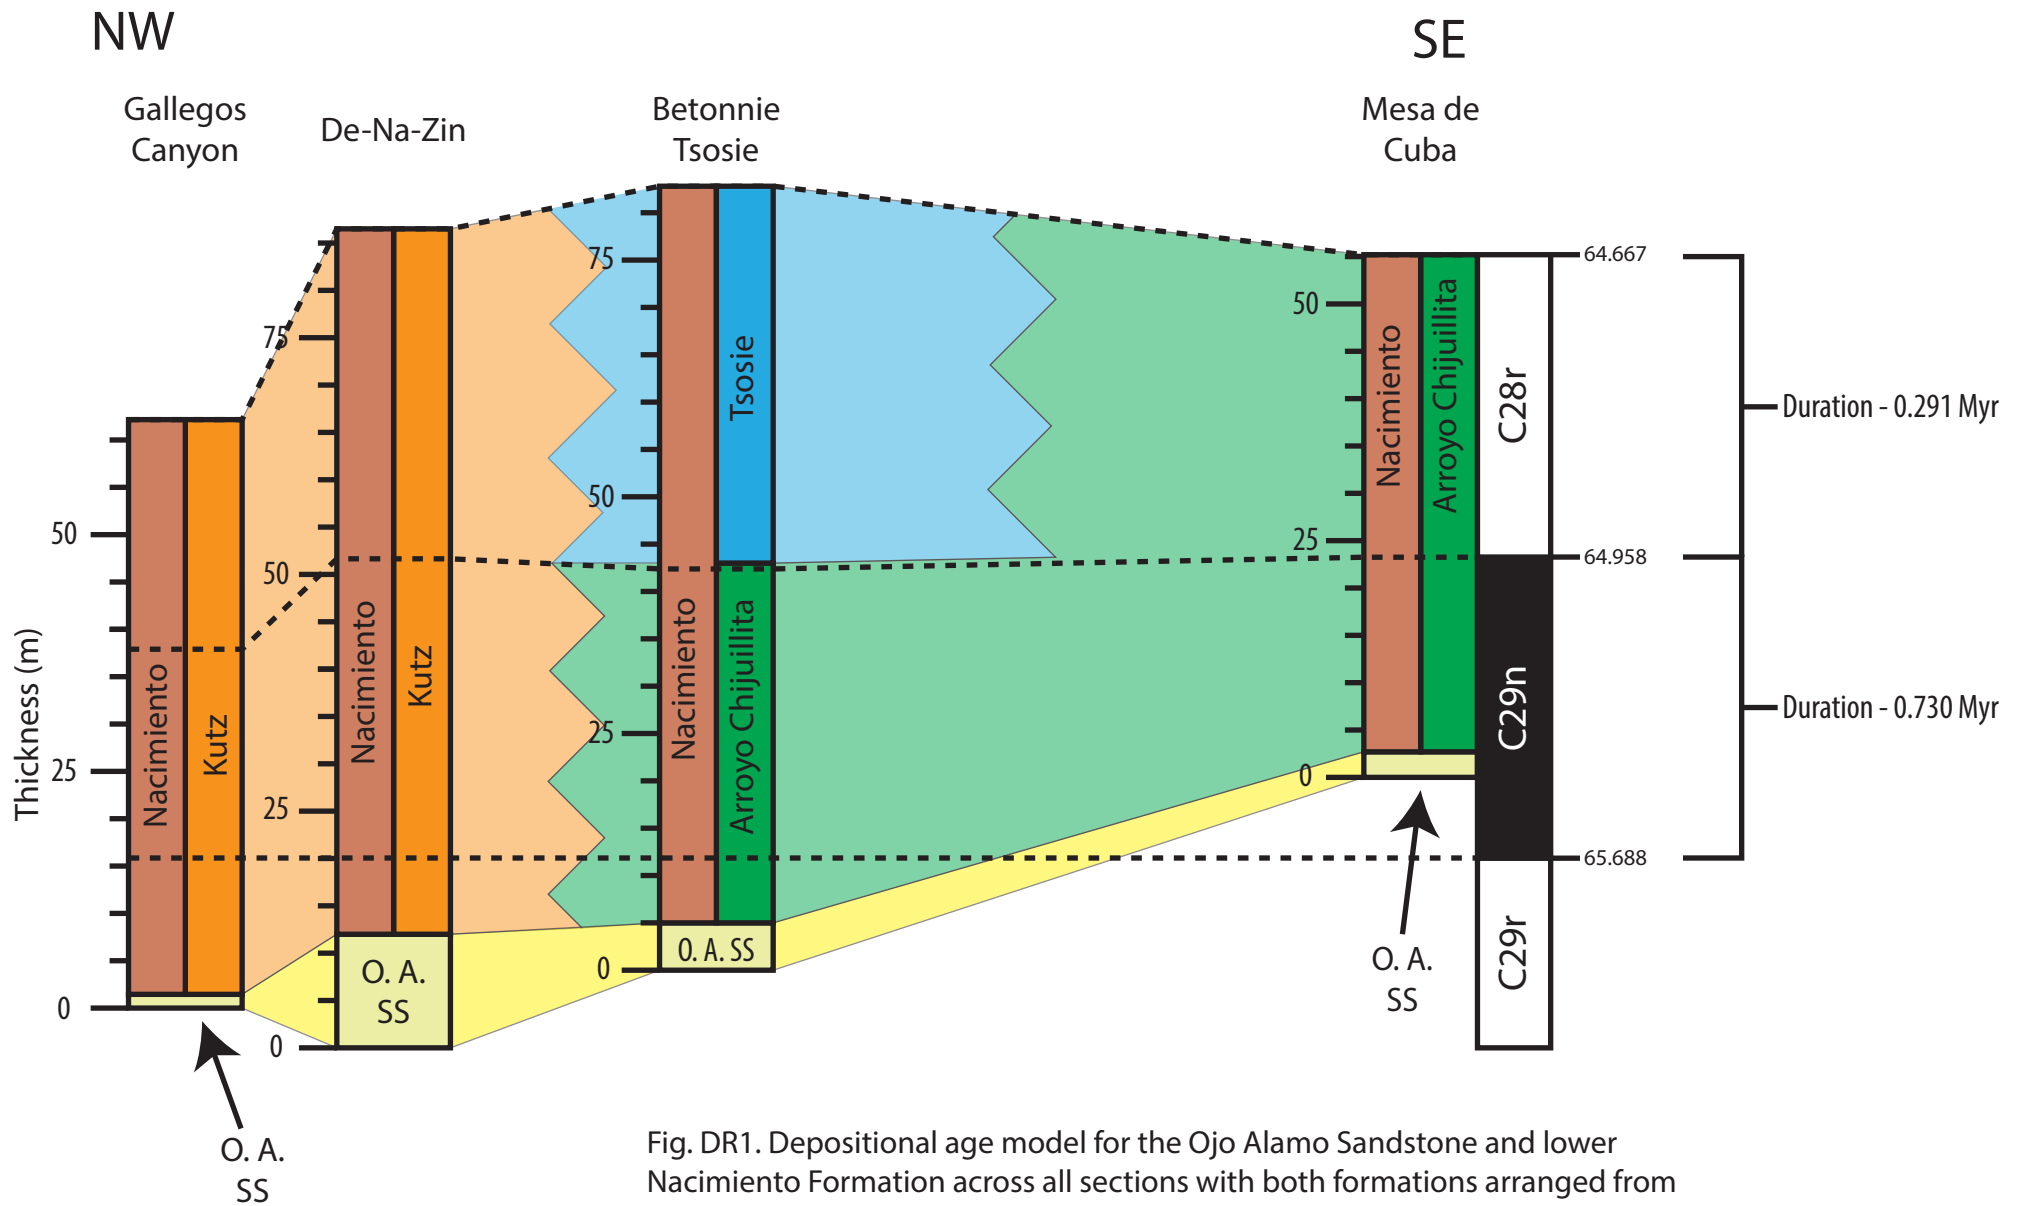

Fig. DR1. Depositional age model for the Ojo Alamo Sandstone and lower Nacimiento Formation across all sections with both formations arranged from northwest to southeast. All section and lithologic information from Figs. 2-4. Chron boundary ages and chron durations from Ogg (2012).
